# Supplementary material for: Tuning proton kinetics in BaCo0.4Fe0.4Zr0.2–XYXO3–δ triple ionic-electronic conductors via aliovalent substitution
Source: Royal Society of Chemistry journal article supplement (doi:10.1039/d3ta00654a), 2023-01-01
Supplement: d3ta00654a1.pdf [file d3ta00654a1.pdf]

**Supporting Information for:**

**Tuning Proton Kinetics in  $\text{BaCo}_{0.4}\text{Fe}_{0.4}\text{Zr}_{0.2-x}\text{Y}_x\text{O}_{3-\delta}$  Triple Ionic-Electronic Conductors via Aliovalent Substitution**

**Jack H. Duffy,<sup>a,b</sup> Harry W. Abernathy,<sup>b</sup> Kyle S. Brinkman<sup>a,b</sup>**

a. Department of Materials Science and Engineering, Clemson University, 515 Calhoun Drive, Clemson, SC 29634, USA. Email: [jhduffy@clemson.edu](mailto:jhduffy@clemson.edu)

b. National Energy Technology Laboratory, United States Department of Energy, 3610 Collins Ferry Road, Morgantown, WV 26507, USA.

### Pristine BCFZY<sub>x</sub> XRD:

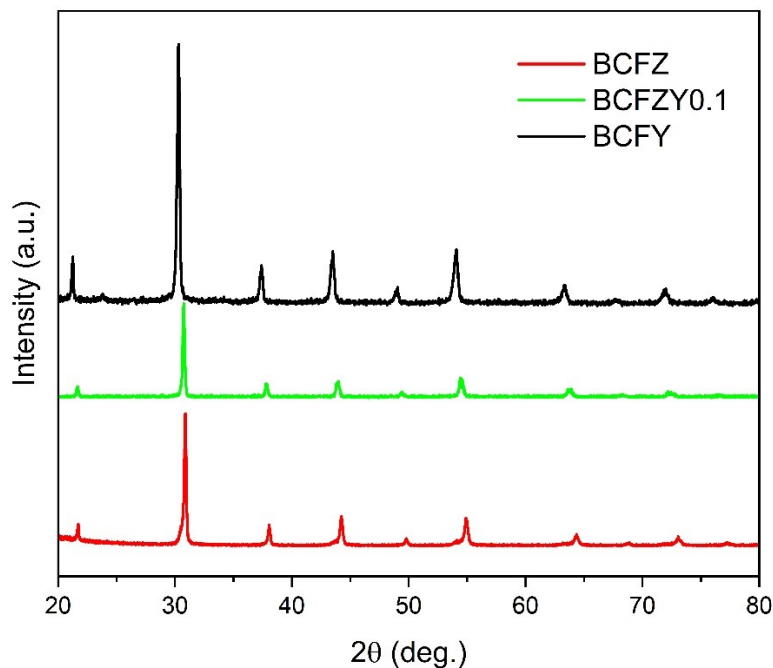

**Figure S1:** Comparison of XRD for pristine BCFZ, BCFZY0.1, and BCFY compositions, showing a general lattice parameter increase with increasing Y concentration.

### Hydrogen permeation on bare membranes:

Based on the total conductivity measurements in the same atmosphere as the permeation measurements, a hysteresis occurs in the stabilization of conductivity after switching temperatures in 50°C increments, as shown in Figure S2. At lower temperatures, this hysteresis can take up to three hours, signifying the need for a period of stabilization for the hydrogen permeation membranes before sample measurements are taken. Initial measurements are therefore taken after this three-hour wait at each temperature. Over three different sampling periods at 600°C, the flux remains stable despite switching temperatures over a 50h permeation measurement as shown in Figure S3.

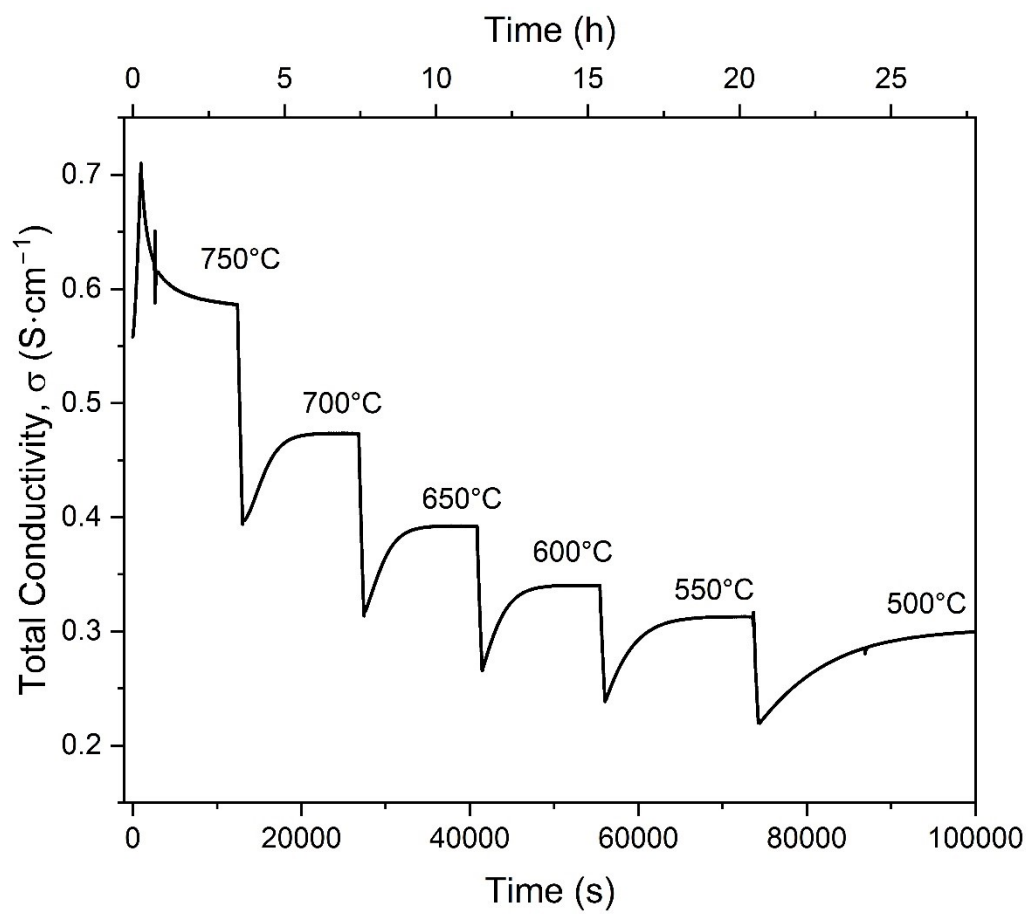

**Figure S2:** Total conductivity of BCFZY0.1 vs Time in reducing atmosphere, showing hysteresis when switching temperatures.

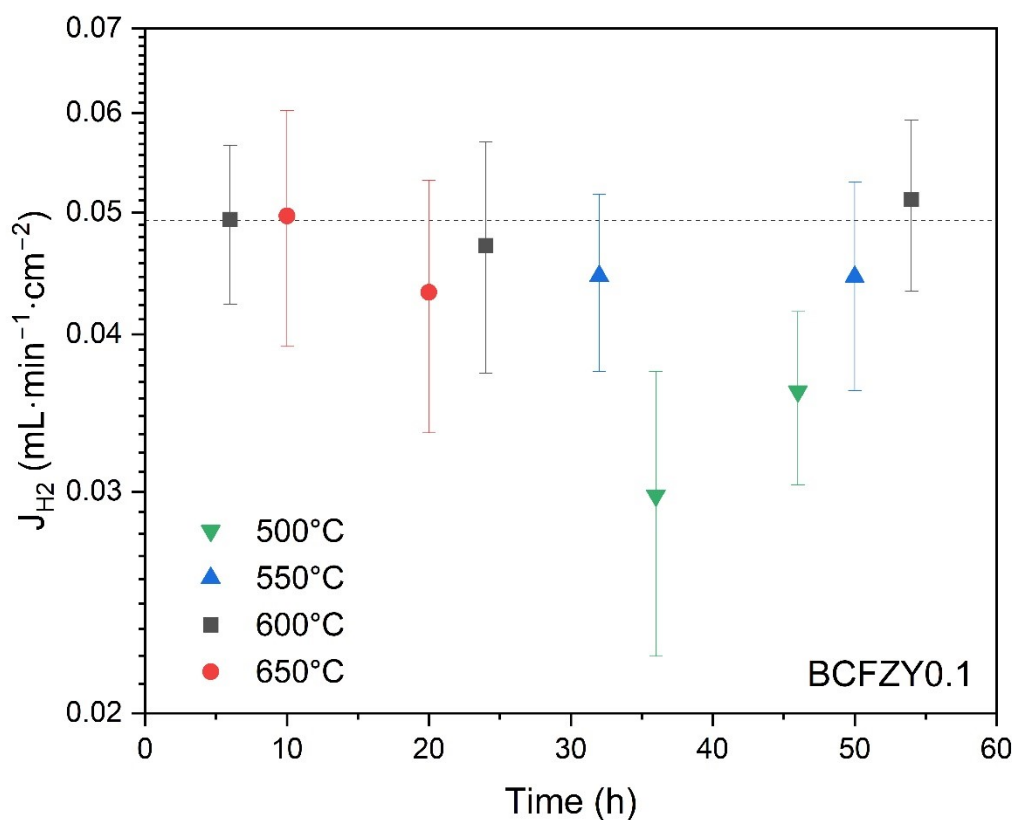

**Figure S3:** Hydrogen flux vs Time for BCFZY0.1, showing stable flux within the range of error at 600°C over 50h. Data points are taken from a one-hour sampling period from which the final five sampling points are averaged, with error bars taken from the propagation error of the measurement. Black dotted line serves as a guide to the eyes for the approximate flux at 600°C.

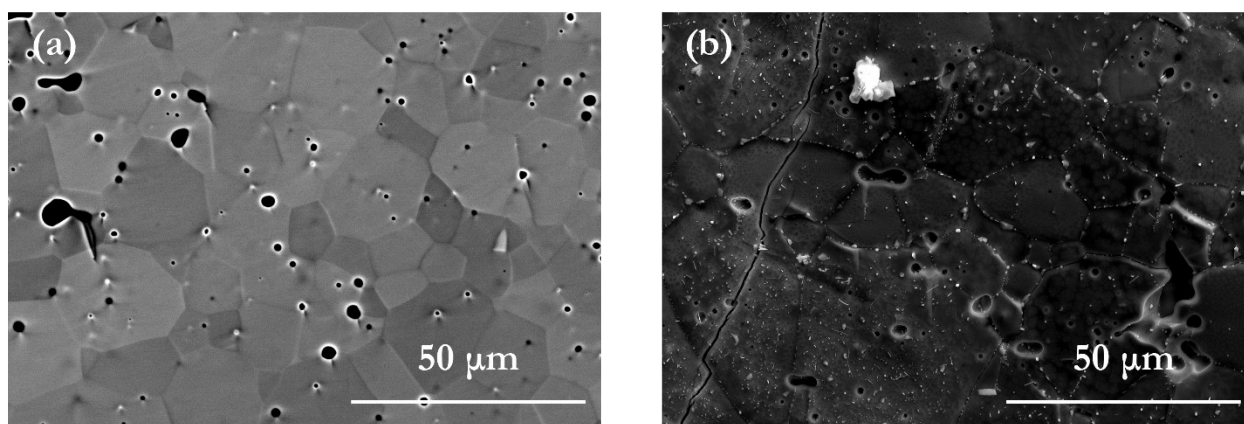

**Figure S4:** Cross-section SEM images of BCFZY0.1 showing (a) 5h and (b) 24h exposure times in 5% H<sub>2</sub> atmosphere. Small, bright dots indicating Co-rich phase appear after 24h exposure.

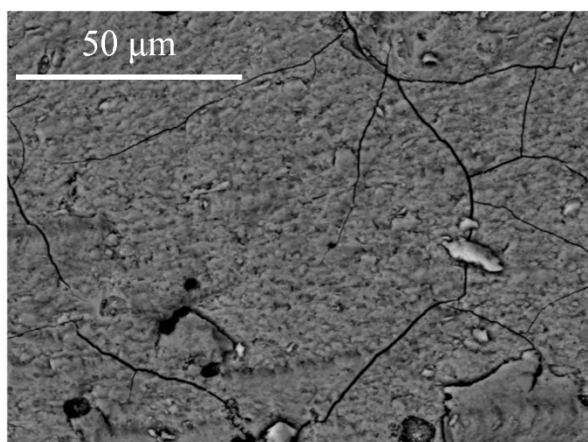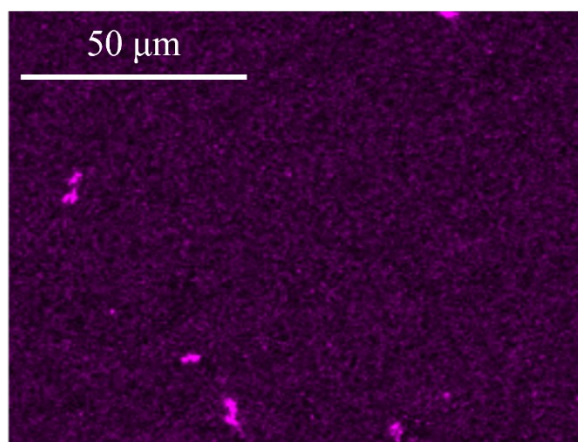

**Figure S5:** Cross-section SEM image of BCFZ with EDX of Cobalt, showing Co-rich phase appear after 50h exposure.

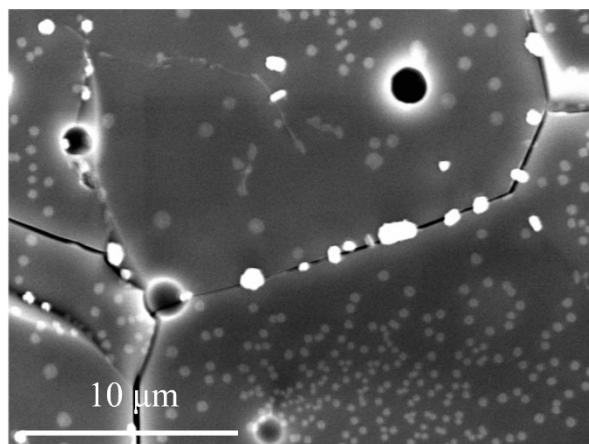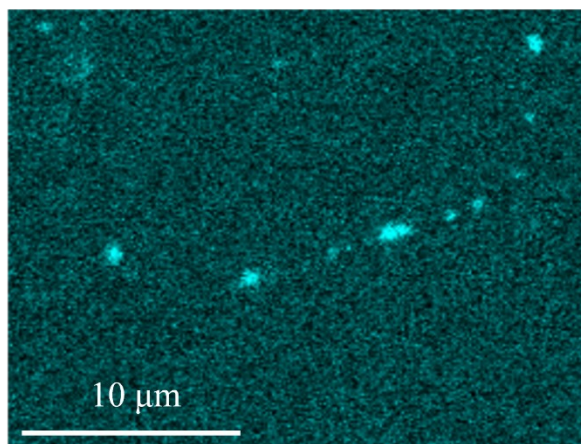

**Figure S6:** Cross-section SEM image of BCFZY0.1 with EDX of Cobalt, showing Co-rich phase appear after 50h exposure.

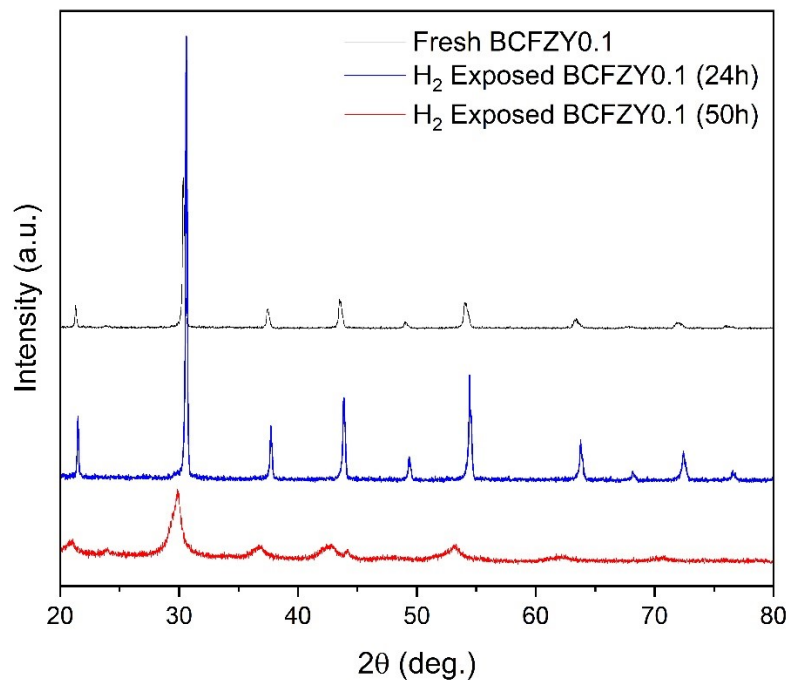

**Figure S7:** XRD for BCFZY0.1 for pristine, 24h-exposed, and 50h-exposed BCFZY0.1. Despite peak-broadening, the perovskite structure remains intact, and no significant change in permeation flux is observed.

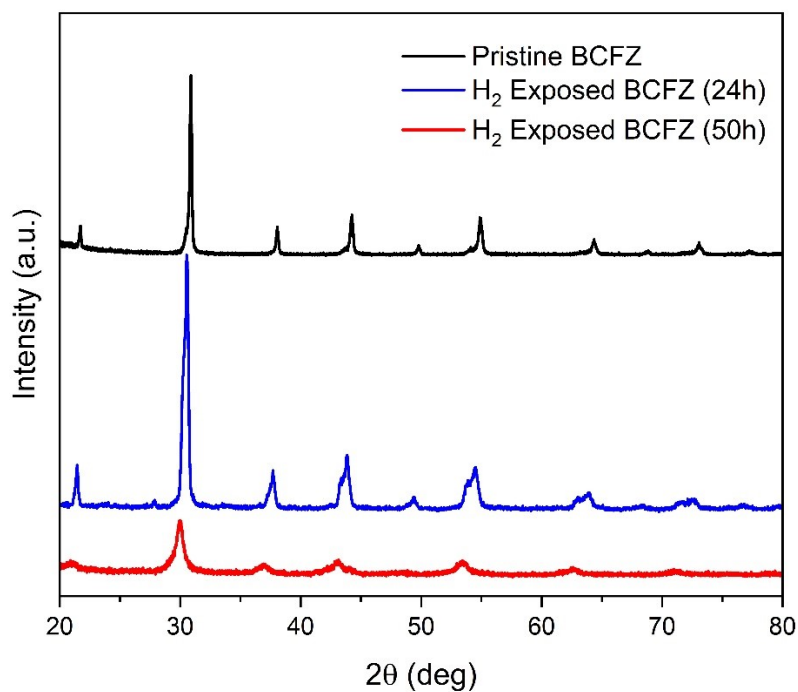

**Figure S8:** XRD for BCFZ for pristine, 24h-exposed, and 50h-exposed BCFZ. Peak splitting begins to show after 24h exposure, followed by peak-broadening at 50h exposure.

## Palladium-Coated Membranes:

### Deposition Procedure:

Pd was sputtered on each side of the BCFZY<sub>x</sub> membranes to achieve an approximately 500nm thickness. The deposition was performed at a target power of 67W from a 2" diameter target in a background pressure of 5 mTorr of Ar, flowing at 20 sccm, lasting about 20 minutes for each side. All samples were placed on a rotating plate during deposition. Following the deposition, the samples were annealed at 800°C for 3h in Ar atmosphere, with a heating rate of 5°C/min and a cooling rate of 2°C/min. Following the anneal, the sidewalls of each BCFZY<sub>x</sub> membrane were polished to remove excess palladium which could cause a short and allow protons only to transport through the palladium. This step was taken to ensure that BCFZY<sub>x</sub> was the limiting factor to proton transport.

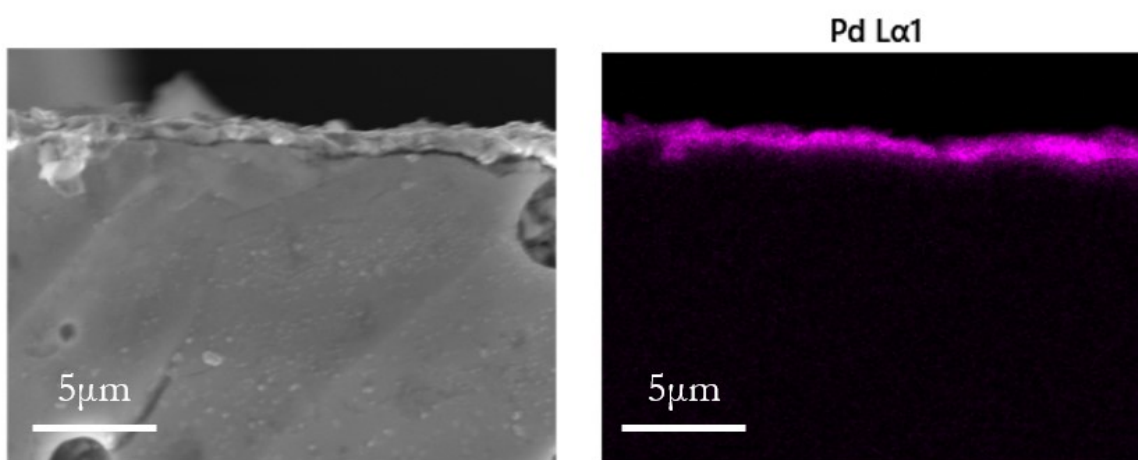

**Figure S9:** Cross-sectional SEM image of BCFZY0.1 membrane coated with a dense layer of palladium (approximately 500nm thickness), with EDX image confirming the composition of the dense layer.

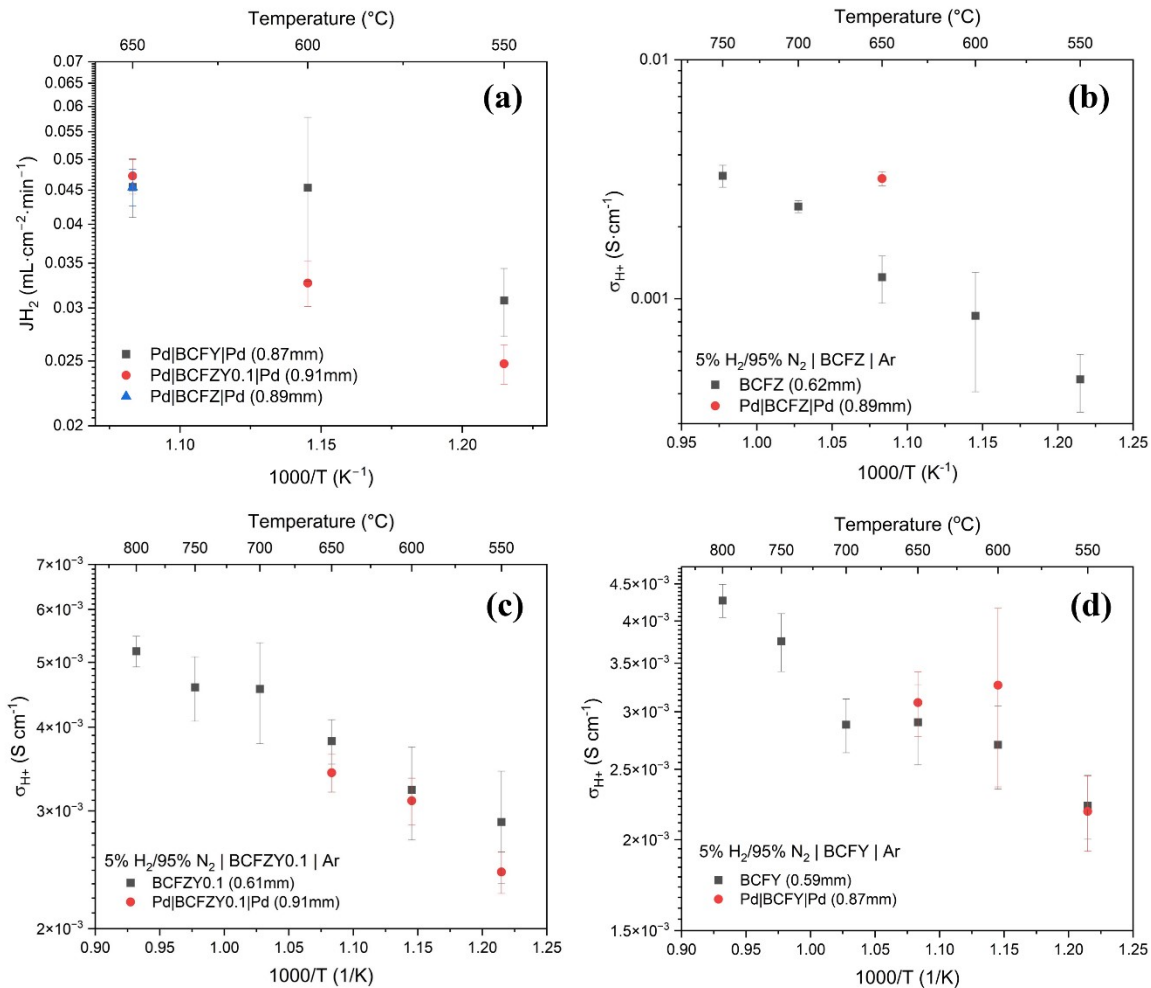

**Figure S10:** (a) Comparison of hydrogen flux for Pd-coated membranes. Comparison of estimated proton conductivity comparing bare and Pd-coated membranes for (b) BCFZ, (c) BCFZY0.1, and (d) BCFY.

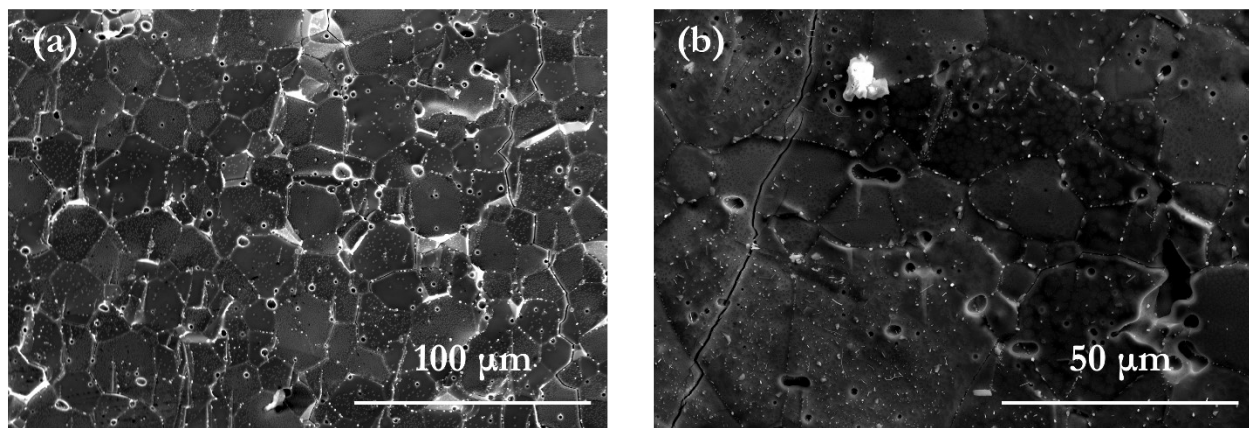

**Figure S11:** Cross-section SEM images after 5%  $H_2$  exposure for (a) Pd-coated and (b) bare BCFZY0.1 membranes, both showing Co-rich nanoparticle segregation at grain boundaries.

## Oxidation ECR fitting of BCFZY<sub>x</sub> compositions:

At high temperatures, BCFZ exhibits the best bulk-level oxygen reduction reaction in purely oxidative environments, which is attributed to the superior diffusivity of BCFZ coupled with a relatively small decrease in surface exchange coefficient; this results in the fastest relaxation. However, the advantage in diffusivity for BCFZ is quickly erased by the poor surface exchange coefficient at lower temperatures, and at 500°C, the relaxation time is more than double that of BCFZY0.1 and BCFY, greatly attributed to its poor  $k_{\text{chem}}$ . Meanwhile, despite its superior surface exchange coefficient, BCFY is always hindered compared to BCFZY0.1 because of its lower diffusivity, which is always lower by about a factor of two. This results in relaxation times which are about 40% longer at all temperatures. The ECR results suggest that BCFZY0.1 may exhibit the best properties as a cathode material for electrochemical devices in the low-to-intermediate-temperature range, while BCFZ may perform effectively in high-temperature devices. These results are shown in Figures S12 and S13 below:

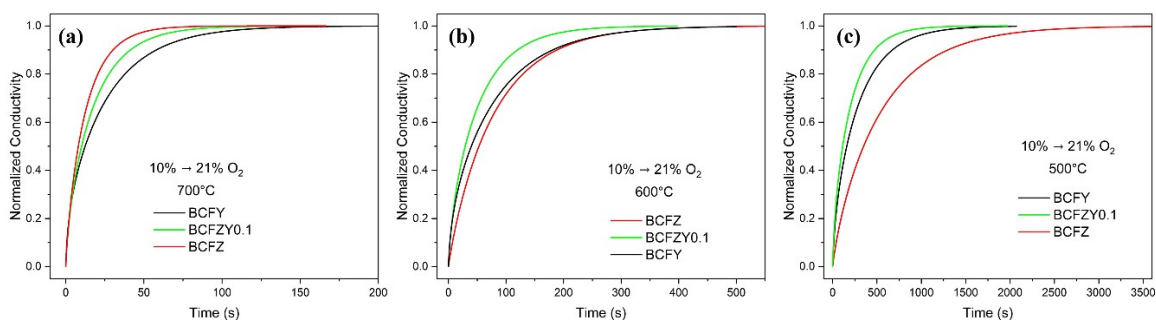

**Figure S12:** Fitted relaxation curves for BCFZY<sub>x</sub> materials at (a) 700°C, (b) 600°C, and (c) 500°C.

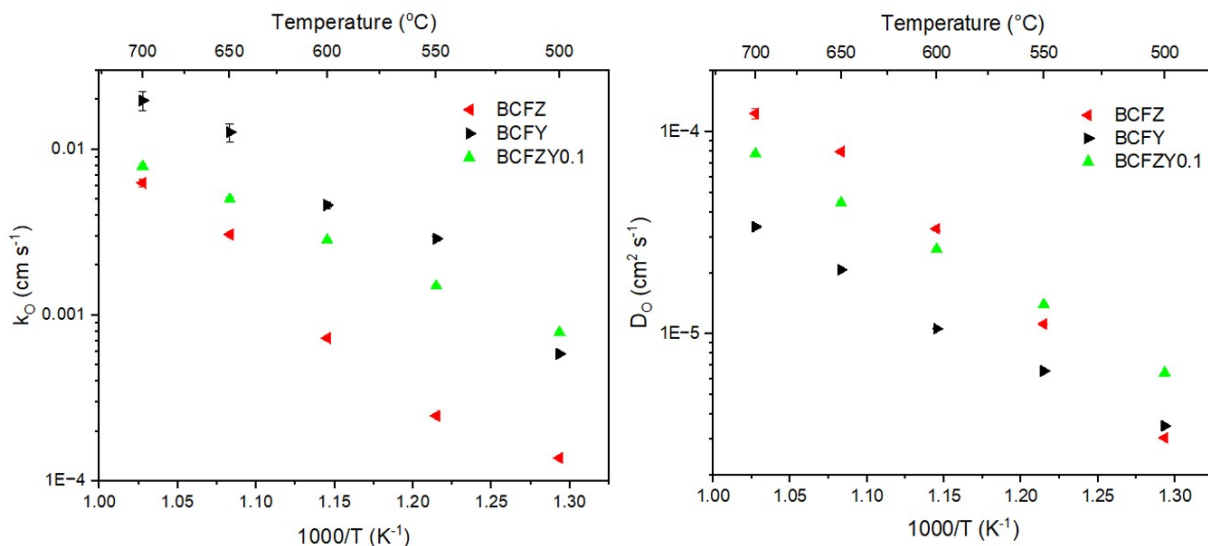

**Figure S13:** Fitting of (a)  $k_{\text{O,chem}}$  and (b)  $D_{\text{O,chem}}$  from ECR measurements for BCFZY<sub>x</sub> materials from 500-700°C in dry, oxidizing conditions, switching from 10% to 21% O<sub>2</sub> atmosphere.

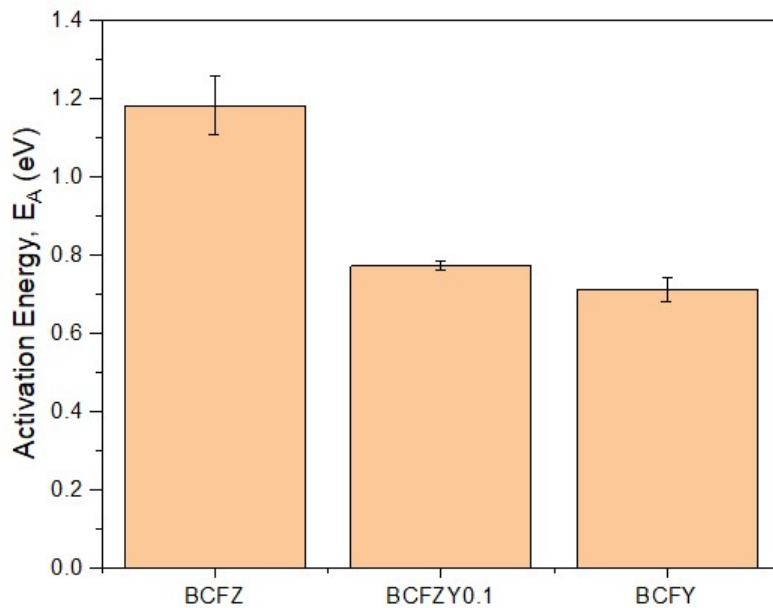

**Figure S14:** Comparison of the activation energy of  $D_{O,chem}$  across the  $BCFZY_X$  compositions.

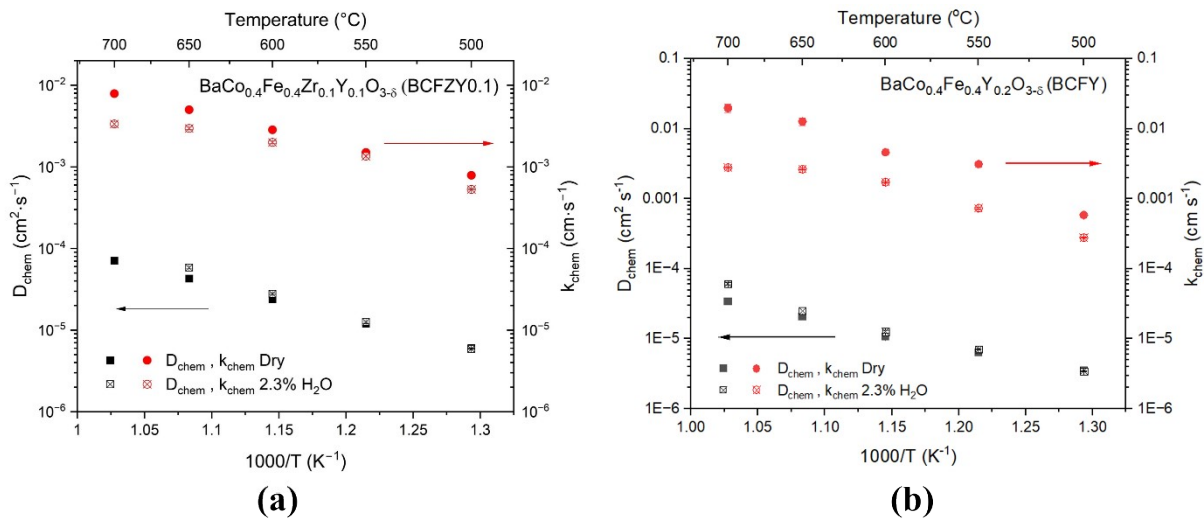

**Figure S15:** Fitting of  $k_{O,chem}$  and  $D_{O,chem}$  for dry and wet conditions for (a) BCFZY0.1, and (b) BCFY.
